# Supplementary material for: C/EBPδ drives interactions between human MAIT cells and endothelial cells that are important for extravasation
Source: eLife journal article supplement (doi:10.7554/elife.32532), 2018-02-22
Supplement: supp [file elife-32532-supp-v1.zip]

Figure 3 – figure supplement 1

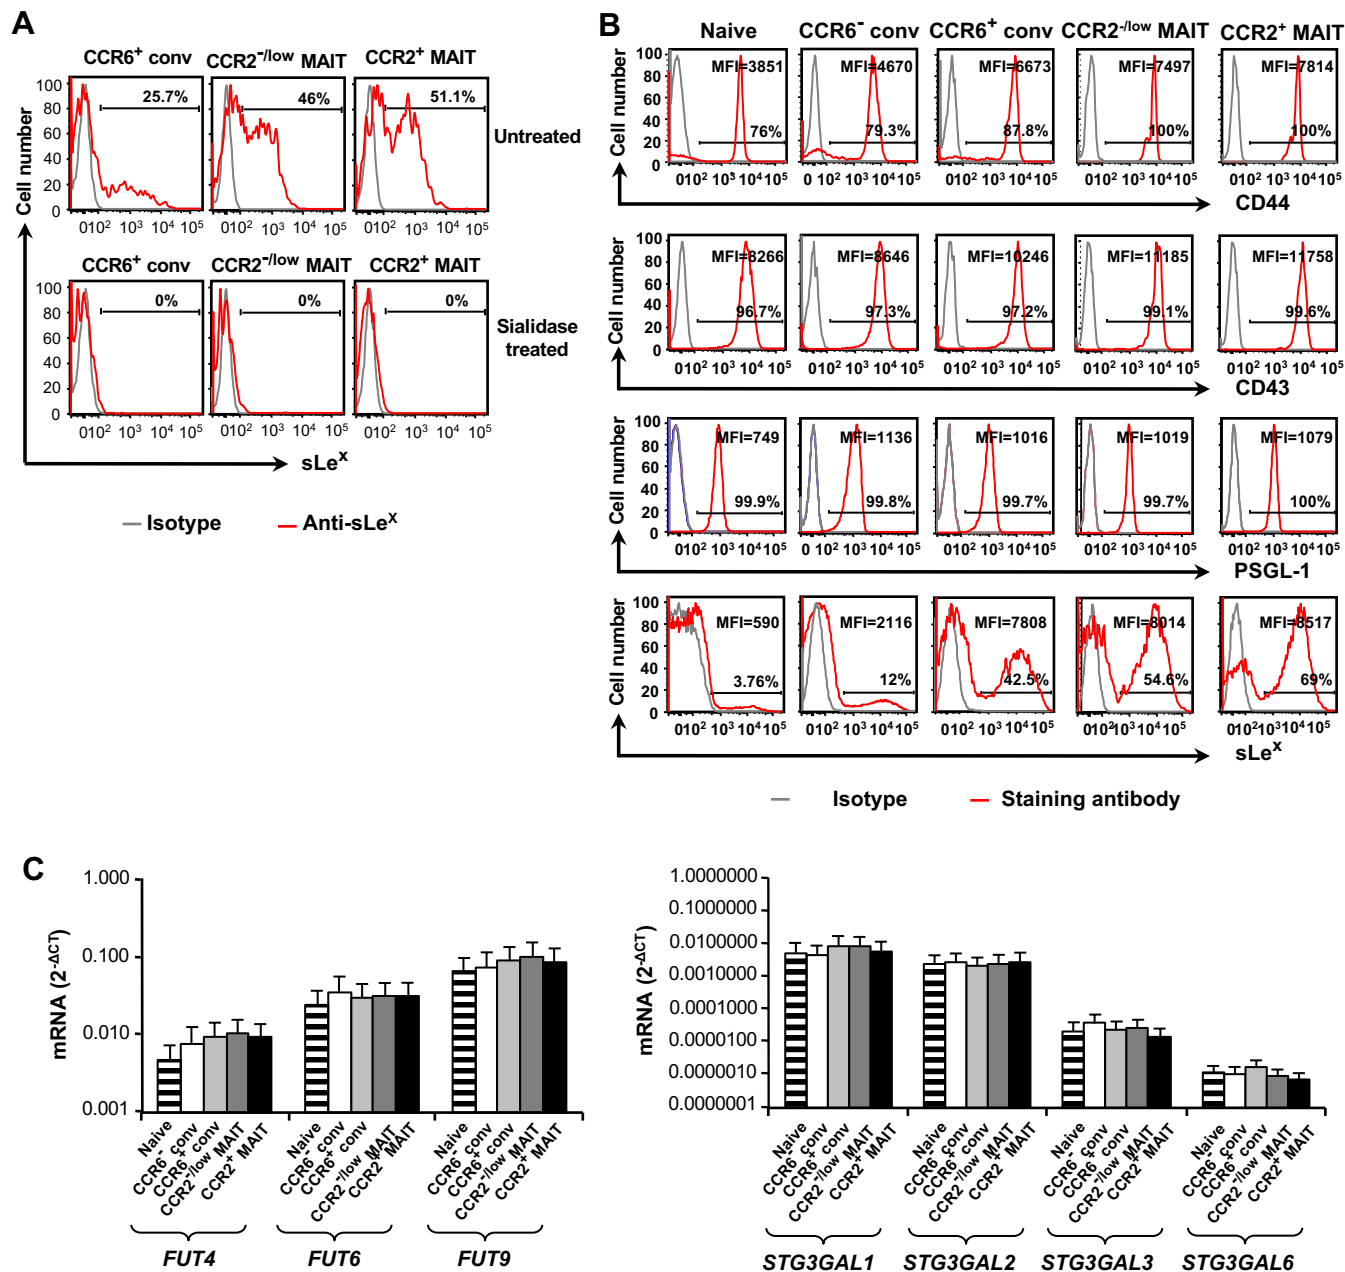

Figure 3 - figure supplement 1. Selectin ligands and glycosyltransferases in CD8 $\alpha$ <sup>+</sup> T cells. (A) Staining of CD8 $\alpha$ <sup>+</sup> T cell subsets either untreated (top) or after treatment with sialidase (bottom) for sLe<sup>x</sup>. Staining with an isotype-matched antibody served as a negative control. Percentages of cells staining positive are indicated by the horizontal lines. Data are from one of two experiments. (B) Staining of CD8 $\alpha$ <sup>+</sup> T cell subsets is shown for sLe<sup>x</sup> and proteins that can serve as selectin ligands. Percentages of cells staining positive are indicated by the horizontal lines. MFI numbers are mean fluorescent intensities. Staining with isotype-matched antibodies served as negative controls. For each surface molecule data are from cells from one representative of four donors. (C) Expression of mRNAs encoded by the glycosyltransferase genes normalized to *GAPDH* expression in the CD8 $\alpha$ <sup>+</sup> T cell subsets. Bars show means  $\pm$  SEM for cells from three donors.
