# Supplementary material for: C/EBPδ drives interactions between human MAIT cells and endothelial cells that are important for extravasation
Source: eLife journal article supplement (doi:10.7554/elife.32532), 2018-02-22
Supplement: supp [file elife-32532-supp-v1.zip]

Figure 7 – figure supplement 1

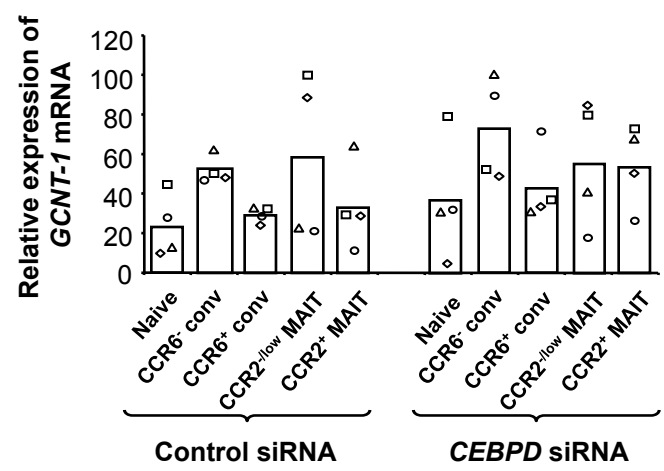

Figure 7- figure supplement 1. No evidence that C/EBP $\delta$  regulates *GCNT1* in MAIT Cells. Relative expression of *GCNT1* mRNA in CD8 $\alpha$ <sup>+</sup> T cell subsets after transfections with control or *CEBPD* siRNA. Bars show means and data are from cells from four donors where each symbol type shows results from an individual donor.
