# Supplementary material for: C/EBPδ drives interactions between human MAIT cells and endothelial cells that are important for extravasation
Source: eLife journal article supplement (doi:10.7554/elife.32532), 2018-02-22
Supplement: supp [file elife-32532-supp-v1.zip]

Figure 2 – figure supplement 1

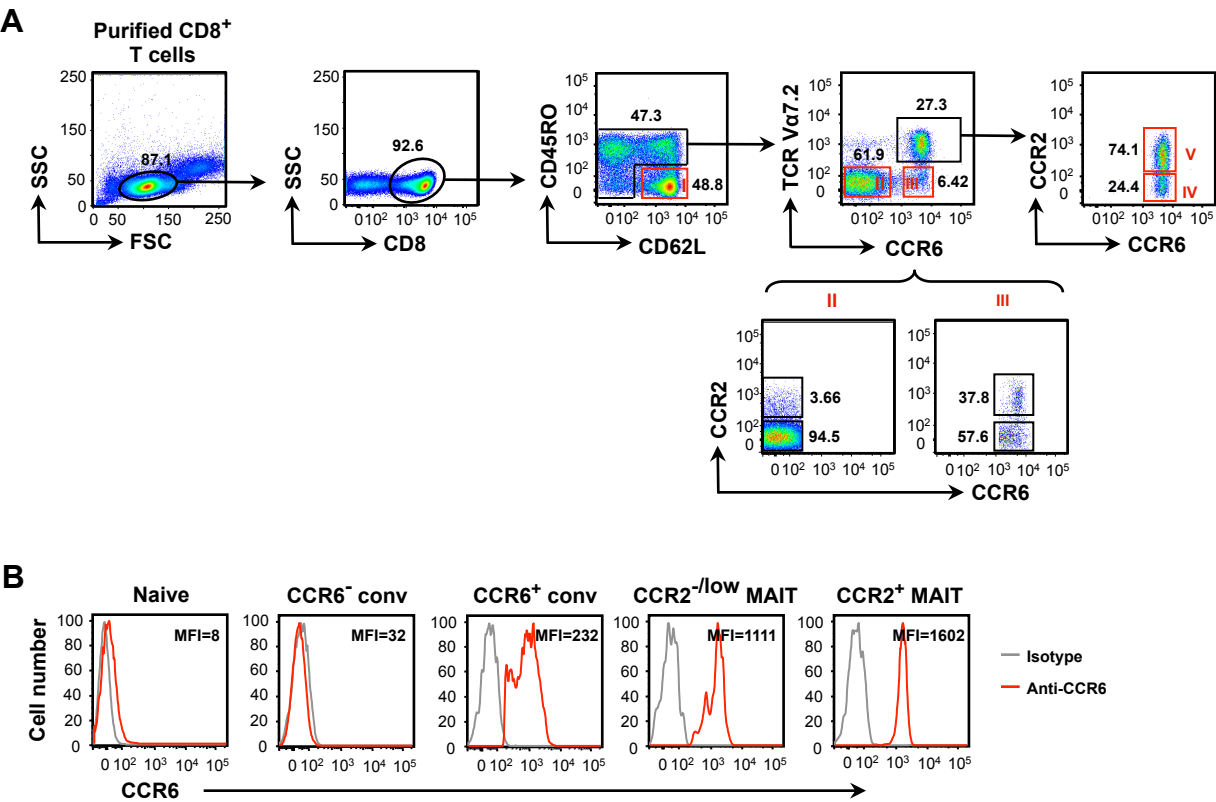

Figure 2 - figure supplement 1. CCR2<sup>+</sup> MAIT cells are CCR6 high . (A) Upper panels show gating for separation of CD8<sup>+</sup> T cells, purified by negative selection, into CD8 $\alpha$ <sup>+</sup> naïve cells (I), CCR6<sup>-</sup> conventional memory-phenotype cells (II), CCR6<sup>+</sup> conventional memory-phenotype cells (III), CCR2<sup>-/low</sup> MAIT cells (IV), and CCR2<sup>+</sup> MAIT cells (V), purified by cell sorting. Sequential gating is shown for cells demarcated by black boxes. Lower panels show CCR2-expressing cells in the CCR6<sup>-</sup> conventional memory-phenotype cells (II) and the CCR6<sup>+</sup> conventional memory-phenotype cells (III). Data are from one representative of more than 20 experiments. (B) Expression of CCR6 on CD8a<sup>+</sup> T cell subsets. Staining with an isotype-matched antibody served as a negative control. MFI is mean fluorescent intensity for CCR6 staining. Data are from one representative of more than 20 experiments.
