# Supplementary material for: C/EBPδ drives interactions between human MAIT cells and endothelial cells that are important for extravasation
Source: eLife journal article supplement (doi:10.7554/elife.32532), 2018-02-22
Supplement: supp [file elife-32532-supp-v1.zip]

Figure 7 – figure supplement 2

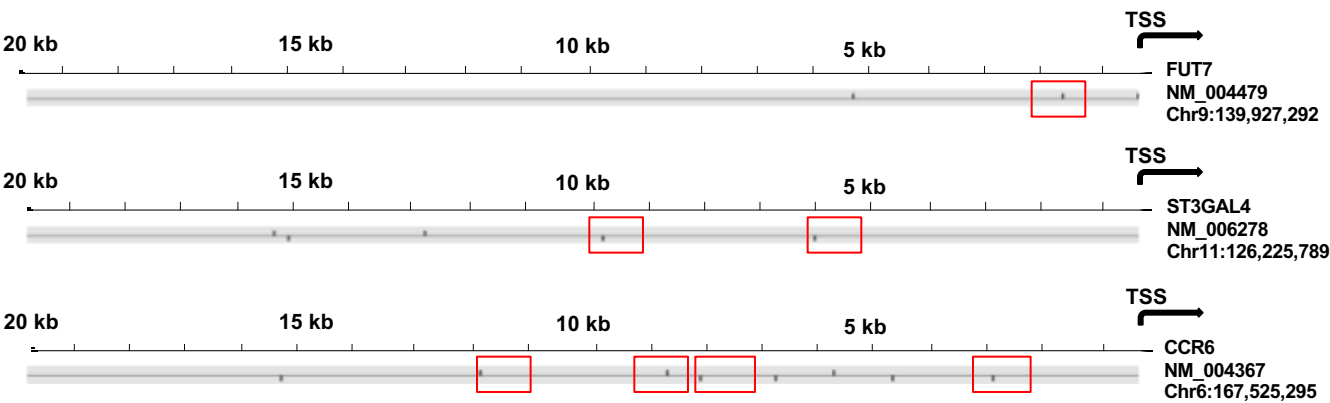

Figure 7 - figure supplement 2. The 5' flanking regions of *FUT7*, *ST3GAL4*, and *CCR6* contain sequences predicted to bind to *C/EBPδ*. Schematic presentation of computationally predicted *C/EBPδ* binding sites. Bindings sites for each gene were predicted in a 20,000 bp region immediately upstream from the start of transcription (TSS, indicated by the arrow). For each gene, the corresponding NCBI RefSeq number and the transcription start site genomic coordinate are provided below the gene name. Each black vertical bar indicates a predicted binding site on the sense strand (pointing up) or anti-sense strand (pointing down). Red boxes indicate *C/EBPδ* binding regions revealed by ChIP assays in Figure 7 that contain predicted *C/EBPδ* binding sites. \* Because *FUT7* is annotated on the anti-sense strand, the reverse-complement of the region was queried and displayed.
