# Supplementary material for: C/EBPδ drives interactions between human MAIT cells and endothelial cells that are important for extravasation
Source: eLife journal article supplement (doi:10.7554/elife.32532), 2018-02-22
Supplement: supp [file elife-32532-supp-v1.zip]

**Figure 4 – figure supplement 1**

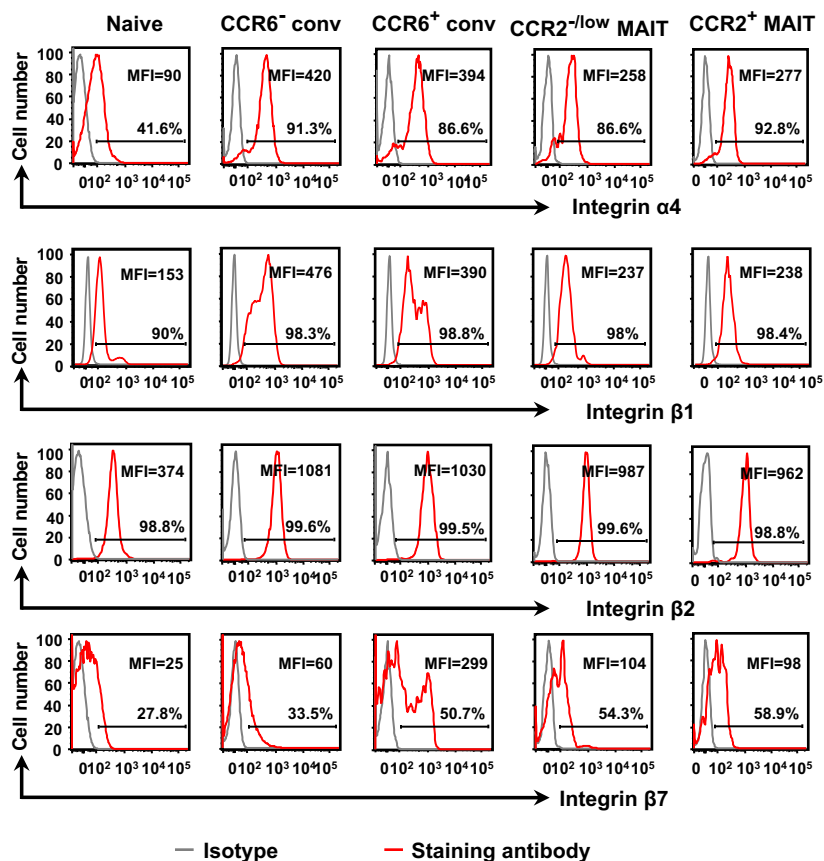

**Figure 4 - figure supplement 1.** Expression of integrins does not account for MAIT cells' arrest on activated endothelial cells. Staining of CD8α<sup>+</sup> T cell subsets is shown for integrin subunits. Percentages of cells staining positive are indicated by the horizontal lines. MFI numbers are mean fluorescent intensities. Staining with isotype-matched antibodies served as negative controls. For each surface molecule data are from cells from one representative of four donors.
