# Supplementary material for: C/EBPδ drives interactions between human MAIT cells and endothelial cells that are important for extravasation
Source: eLife journal article supplement (doi:10.7554/elife.32532), 2018-02-22
Supplement: supp [file elife-32532-supp-v1.zip]

Figure 6 – figure supplement 1

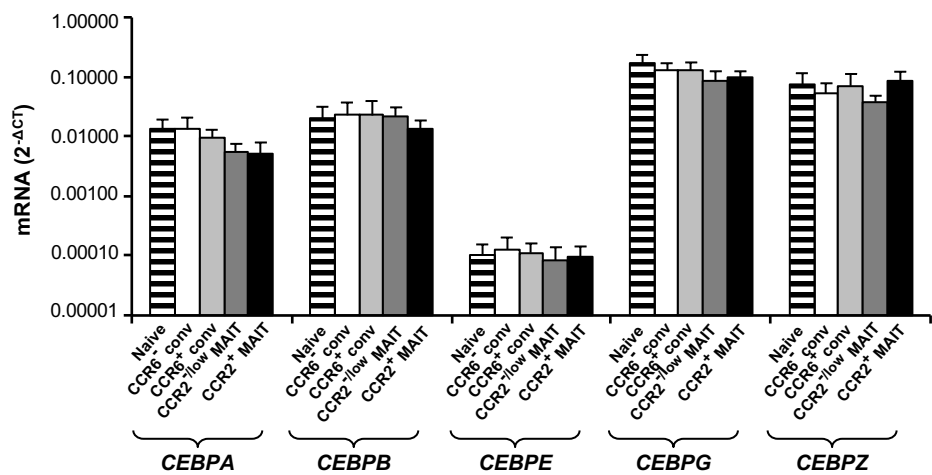

Figure 6 - figure supplement 1. Multiple *CEBP* genes are similarly expressed among CD8α<sup>+</sup> T cell subsets . Expression of mRNAs encoded by the *CEBP* genes, normalized to *GAPDH* expression, as indicated in the CD8α<sup>+</sup> T cell subsets. Bars show means ± SEM for cells from four donors.
