# Supplementary material for: C/EBPδ drives interactions between human MAIT cells and endothelial cells that are important for extravasation
Source: eLife journal article supplement (doi:10.7554/elife.32532), 2018-02-22
Supplement: supp [file elife-32532-supp-v1.zip]

**Figure 5 – figure supplement 1**

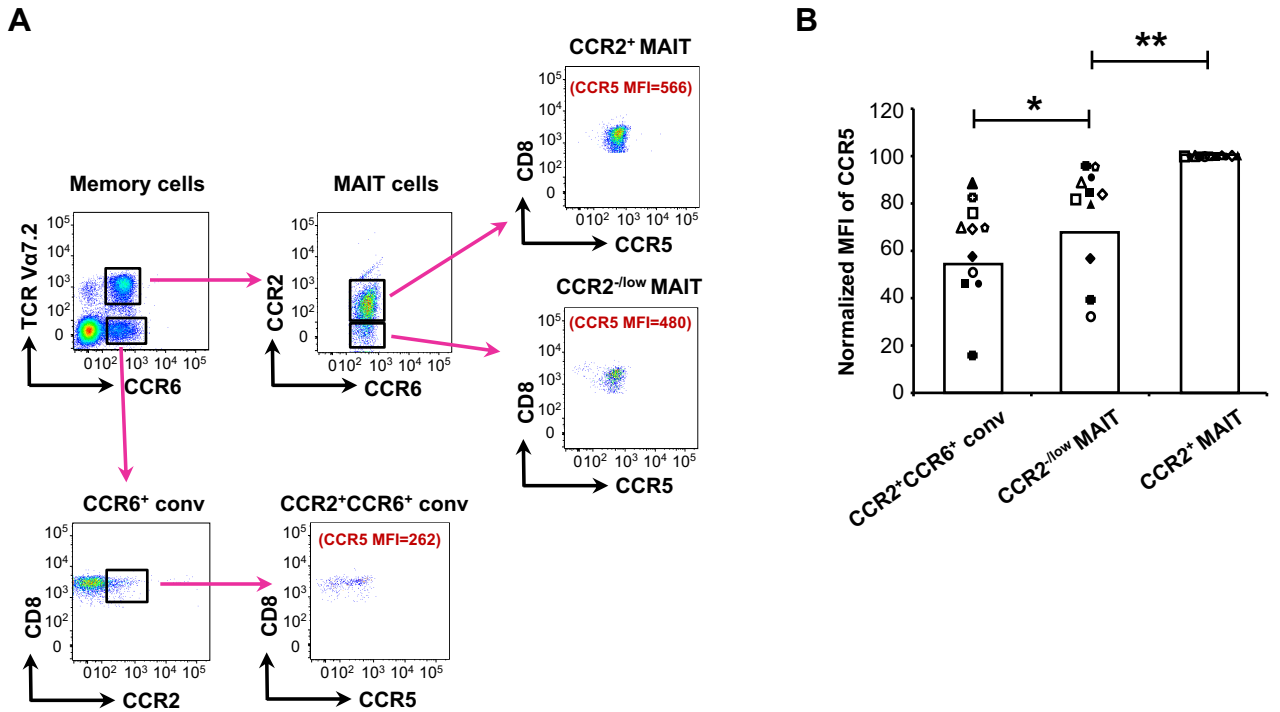

**Figure 5 - figure supplement 1. Levels of CCR5 expression differ among CD8 $\alpha$ <sup>+</sup> subsets. (A) Gating for identifying CCR2<sup>+</sup> MAIT cells, CCR2<sup>-low</sup> MAIT cells, and CCR2<sup>+</sup>CCR6<sup>+</sup> conventional memory-phenotype cells for analyzing CCR5 mean fluorescent intensities (MFI). Sequential gating is shown for cells demarcated by black boxes. Data are from one representative of 11 donors. (B) MFI's for CCR5 were determined for the three subsets shown in A from 11 donors, with each donor identified by a unique symbol. For each donor, the subset with the highest MFI for CCR5 was used to establish the value of 100, and the CCR5 MFI's for the remaining two subsets were normalized accordingly. Bars show means. The p values were calculated using the Wilcoxon signed rank test. \*, p < 0.05; \*\*, p < 0.01.**
