# Supplementary material for: C/EBPδ drives interactions between human MAIT cells and endothelial cells that are important for extravasation
Source: eLife journal article supplement (doi:10.7554/elife.32532), 2018-02-22
Supplement: supp [file elife-32532-supp-v1.zip]

**Figure 2 – figure supplement 2**

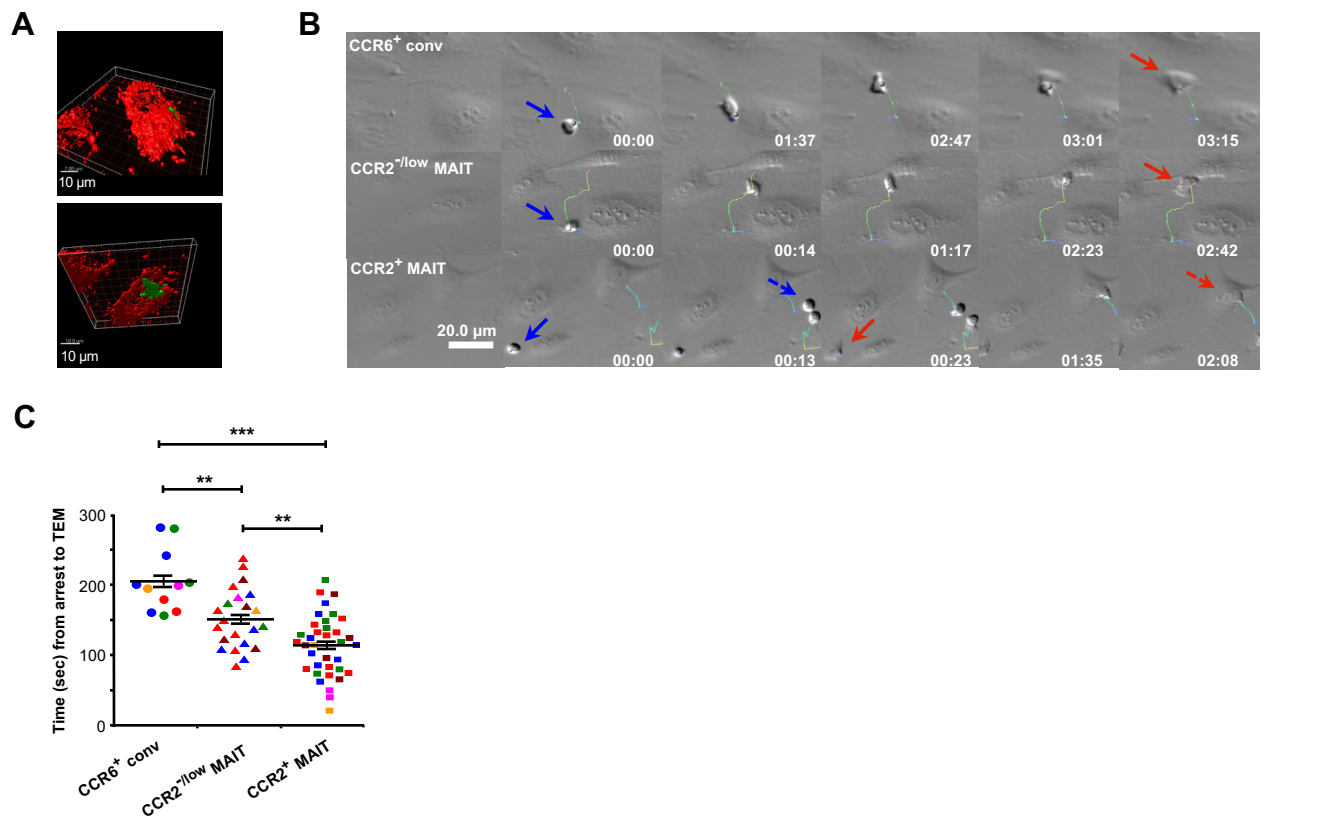

**Figure 2 - figure supplement 2. CCR2<sup>+</sup> MAIT cells undergo rapid TEM. (A) View from the top (above) and bottom (below) using three-dimensional volume renderings of CFSE-stained CCR2<sup>+</sup> MAIT cells migrating across a monolayer of Red CMTPX-stained TNF $\alpha$ -activated HUVECs under flow. Data are from one representative of four experiments. (B) Time-lapse images of CD8 $\alpha$ <sup>+</sup> CCR6<sup>+</sup> conventional T cells, CCR2<sup>-/low</sup> MAIT cells, and CCR2<sup>+</sup> MAIT cells on TNF $\alpha$ -activated HUVEC under flow. Time 0 is at the arrest of the first cell within each subset (row), and times elapsed are shown in minutes:seconds. For crawling cells, tracks are color-coded for time from early (blue-green) to late (red). Blue arrows indicate cells at the time of arrest and red arrows at the time of initiating TEM. Two transmigrating CCR2<sup>+</sup> MAIT cells are shown, marked separately with solid and dashed arrows. (C) Times between arrest and initiating TEM for cells within the CD8 $\alpha$ <sup>+</sup> T cell subsets on TNF $\alpha$ -activated HUVECs. Each symbol represents an individual cell and colors identify data from individual donors. Means  $\pm$  SEM are indicated for each subset. Data in (B) are of cells from one representative of more than ten donors. Cells from five of these donors were used for the analysis in (C), for which p values were calculated using the unpaired t test. \*\*, p < 0.01; \*\*\*, p < 0.001.**
